# Supplementary material for: Advancing mitochondrial DNA analysis: Utility of PacBio long-read sequencing technology in accurate and precise mtDNA SNV and CNV variant detection
Source: Research Square preprint supplement (doi:10.21203/rs.3.rs-6727783/v1), 2025-06-12
Supplement: Supplementary file 1 [file bf6417719f0aa5707440ae36.docx]

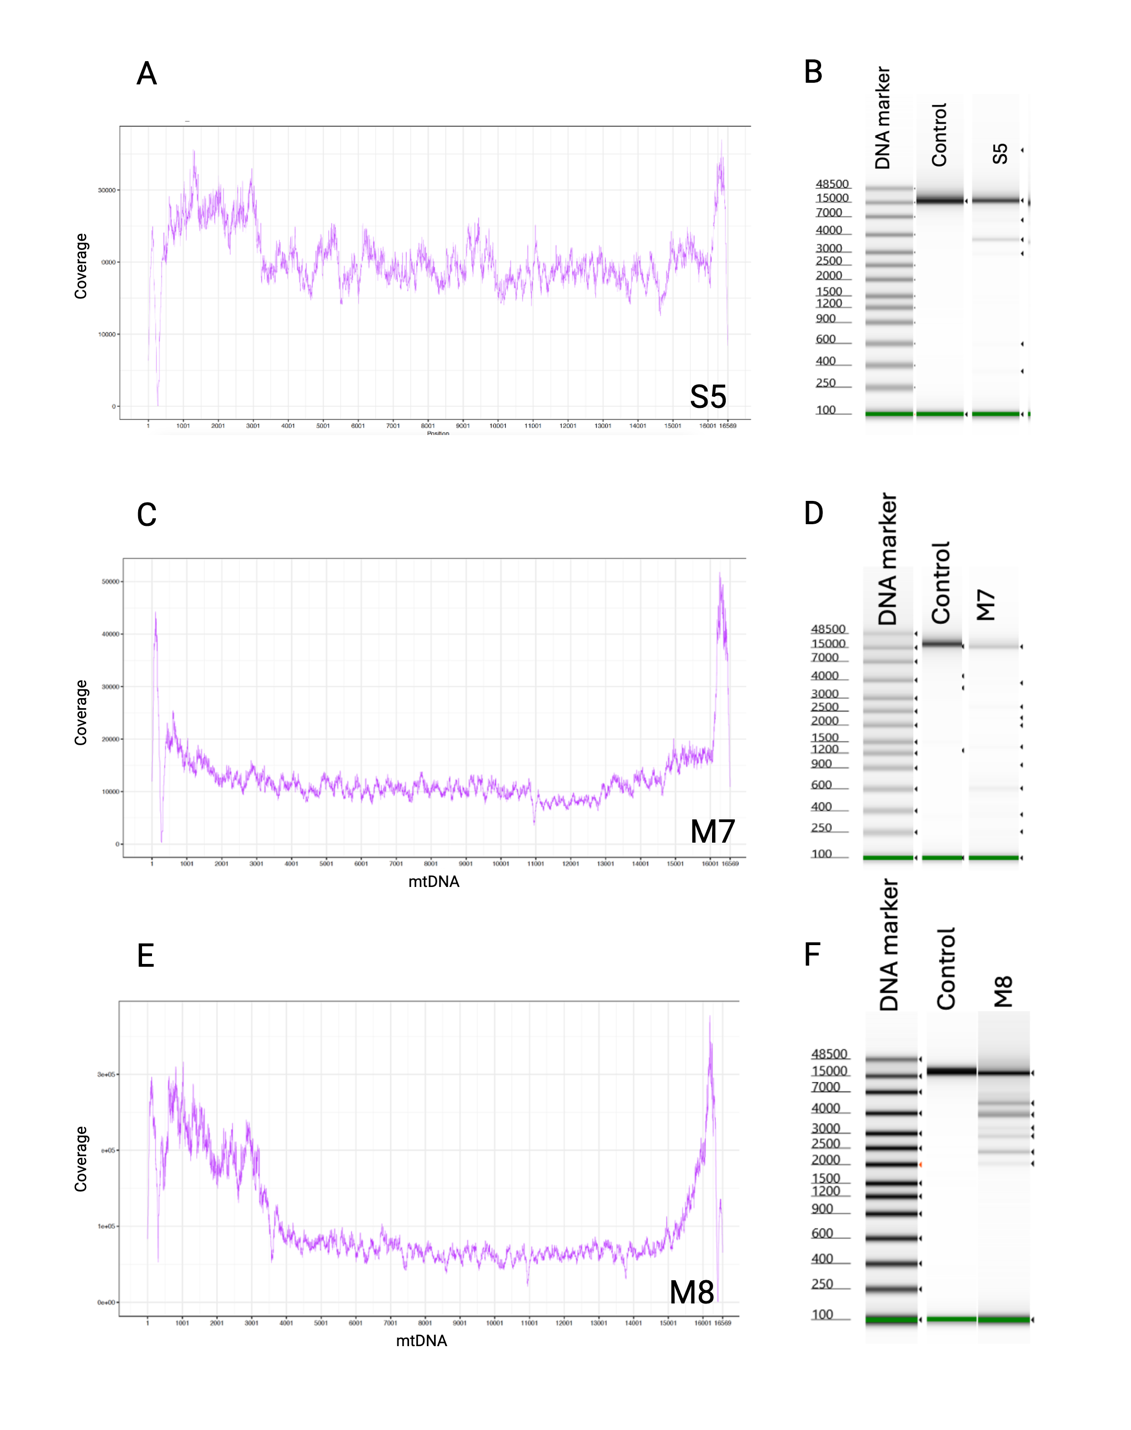


**Supplementary Material S1:** MMD detected by long-range PCR and NGS.

The NGS coverage profile showing the NGS read depth (y-axis) across the mtDNA position (x-axis) indicates the presence of large-scale mtDNA deletions (A,C, E). Long-range PCR gel images: The presence of single deletion band (B) and multiple deletion bands supports the detection of SLSMD and MMD by NGS.

**Supplementary Material S2:** Reproducibility of SNV detection by LRS

| SNVs detected in M1 | | SNVs detected in M7 | |
| --- | --- | --- | --- |
| M1 Replicate 1 | M1 Replicate 2 | M7 Replicate 1 | M7 Replicate 2 |
| m.263A>G | m.263A>G | m.263A>G | m.263A>G |
| m.750A>G | m.750A>G | m.750A>G | m.750A>G |
| m.1438A>G | m.1438A>G | m.1393G>A | m.1393G>A |
| m.3992C>T | m.3992C>T | m.1438A>G | m.1438A>G |
| m.4024A>G | m.4024A>G | m.1719G>A | m.1719G>A |
| m.4769A>G | m.4769A>G | m.4769A>G | m.4769A>G |
| m.5004T>C | m.5004T>C | m.4793A>G | m.4793A>G |
| m.8269G>A | m.8269G>A | m.8860A>G | m.8860A>G |
| m.8860A>G | m.8860A>G | m.10931T>C | m.10931T>C |
| m.9123G>A | m.9123G>A | m.15326A>G | m.15326A>G |
| m.10044A>G | m.10044A>G | m.16261C>T | m.16261C>T |
| m.14365C>T | m.14365C>T | m.16519T>C | m.16519T>C |
| m.14582A>G | m.14582A>G |  |  |
| m.15326A>G | m.15326A>G |  |  |

**Supplementary Data S3:** SNV Comparison for All Samples and Heteroplasmy Levels

This spreadsheet contains a comparison of all SNVs called from SR-NGS and LRS workflows described in this study. Samples are organized in tabs. “N/A” in columns with SR-NGS data denote sites where no data was available because the SNVs occurred within the primer set 2 used for LR-PCR amplification.


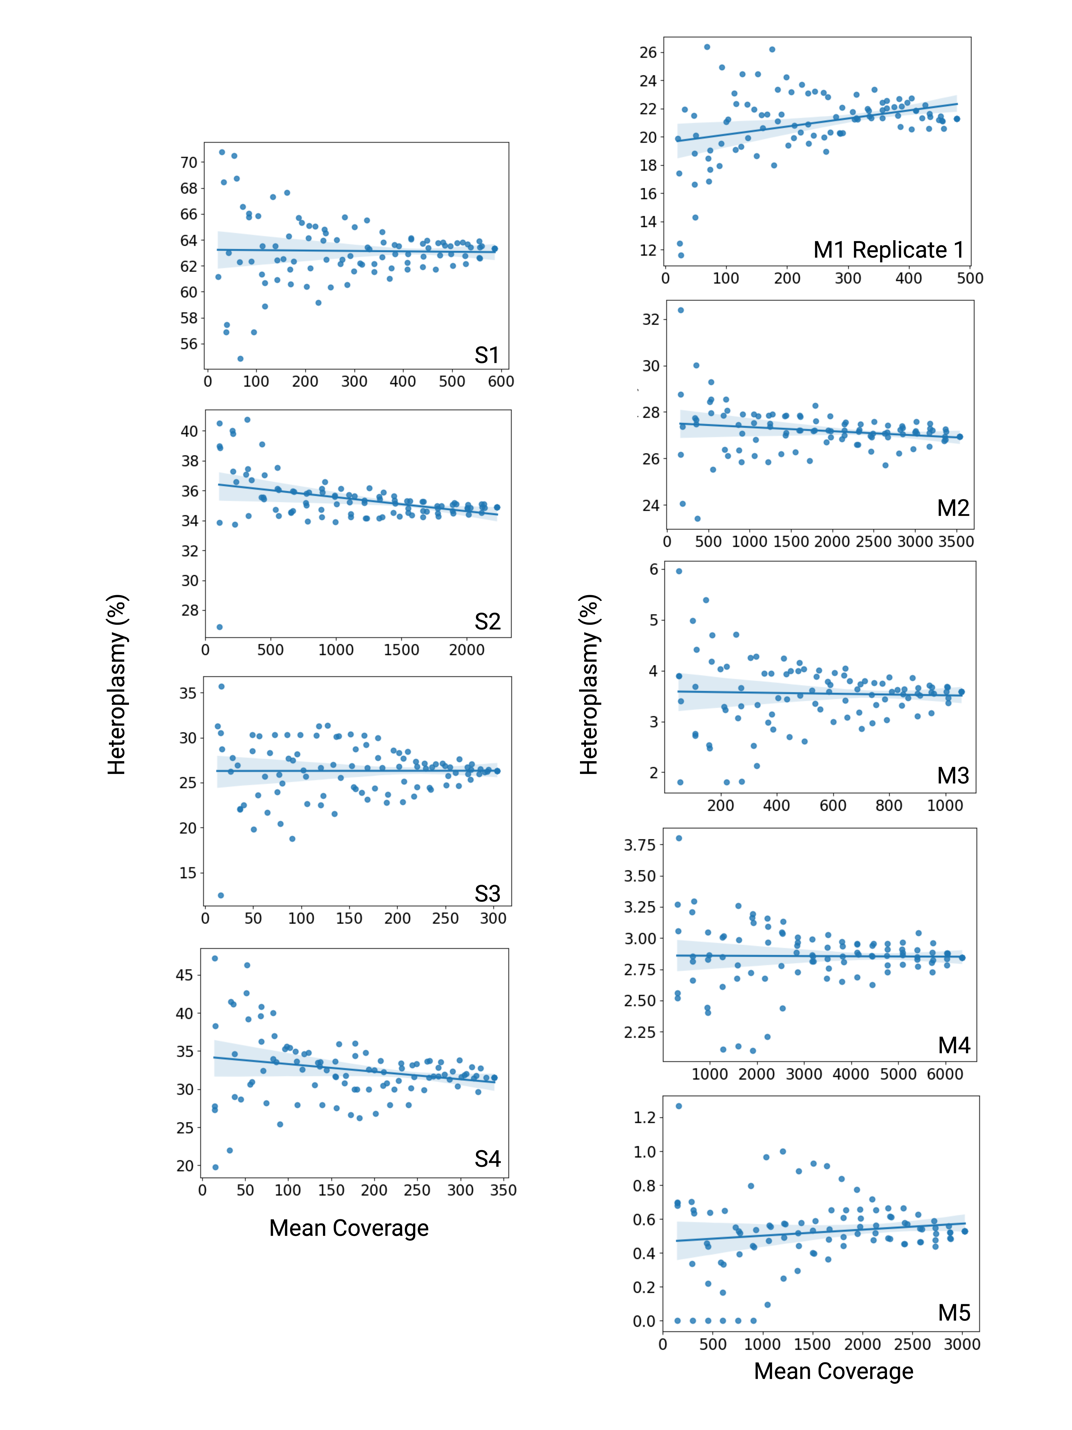
**Supplementary Material S4:** Effects of sequencing coverage on deletion heteroplasmy quantification**.**

Datasets of varying mean coverage were simulated for each sample by randomly subsampling the long-read sequencing reads. Deletion heteroplasmy (y-axis) was calculated for each dataset and is plotted here against the mean coverage (x-axis).
